# Supplementary material for: Imaging and Gross Pathological Appearance of Changes in the Parasagittal Grooves of Thoroughbred Racehorses
Source: MDPI journal article supplement (doi:10.3390/ani11123366), 2021-11-24
Supplement: s1 [file s1]

**Table S1.** Tables showing the agreeance between CT and MRI for detection of bone defects in the lateral and medial parasagittal grooves (PSG) of the distal third metacarpal and metatarsal bones. CT is considered gold standard.

|                              | No lateral PSG defect on CT | Lateral PSG defect on CT | TOTAL |
|------------------------------|-----------------------------|--------------------------|-------|
| No lateral PSG defect on MRI | 30 (86% true negatives)     | 19 (46% false negatives) | 49    |
| Lateral PSG defect on MRI    | 5 (14% false positives)     | 22 (54% true positives)  | 27    |
| TOTAL                        | 35                          | 41                       | 76    |

|                             | No medial PSG defect on CT | Medial PSG defect on CT  | TOTAL |
|-----------------------------|----------------------------|--------------------------|-------|
| No medial PSG defect on MRI | 20 (65% true negatives)    | 11 (24% false negatives) | 31    |
| Medial PSG defect on MRI    | 11 (35% false positives)   | 34 (76% true positives)  | 45    |
| TOTAL                       | 31                         | 45                       | 76    |

**Table S2.** Tables showing the agreeance between CT and radiography for detection of bone defects in the lateral and medial parasagittal grooves (PSG) of the distal third metacarpal and metatarsal bones. CT is considered gold standard.

|                                      | No lateral PSG defect on CT | Lateral PSG defect on CT | TOTAL |
|--------------------------------------|-----------------------------|--------------------------|-------|
| No lateral PSG defect on radiography | 30 (86% true negatives)     | 34 (83% false negatives) | 64    |
| Lateral PSG defect on radiography    | 5 (14% false positives)     | 7 (17% true positives)   | 12    |
| TOTAL                                | 35                          | 41                       | 76    |

|                                     | No medial PSG defect on CT | Medial PSG defect on CT  | TOTAL |
|-------------------------------------|----------------------------|--------------------------|-------|
| No medial PSG defect on radiography | 26 (84% true negatives)    | 24 (53% false negatives) | 50    |
| Medial PSG defect on radiography    | 5 (16% false positives)    | 21 (47% true positives)  | 26    |
| TOTAL                               | 31                         | 45                       | 76    |

**Table S3.** Prevalence of cartilage lesions in the lateral and medial parasagittal grooves on gross pathology, CT and MRI. Results are also divided into groups by reason for death (fetlock fracture FF, other fracture OF, non-fracture NF), age (adult: >3 years old, juvenile: 2 and 3 year olds) and contralateral limb to fracture (contralateral, control).

|                               | Overall<br>n (%) | FF<br>n (%) | OF<br>n (%) | NF<br>n (%) | Adult<br>n (%) | Juvenile<br>n (%) | Contralateral<br>n (%) | Control<br>n (%) |
|-------------------------------|------------------|-------------|-------------|-------------|----------------|-------------------|------------------------|------------------|
| CT - Lateral PSG              |                  |             |             |             |                |                   |                        |                  |
|                               | 68 (85%)         | 15 (100%)   | 24 (100%)   | 29 (81%)    | 24 (78%)       | 44 (92%)          | 11 (100%)              | 29 (81%)         |
| CT - Medial PSG               |                  |             |             |             |                |                   |                        |                  |
|                               | 69 (86.25%)      | 14 (93%)    | 23 (96%)    | 32 (89%)    | 25 (93%)       | 44 (92%)          | 10 (91%)               | 32 (89%)         |
| MRI - Lateral PSG             |                  |             |             |             |                |                   |                        |                  |
|                               | 59 (73.25%)      | 13 (81%)    | 24 (100%)   | 22 (61%)    | 20 (74%)       | 39 (80%)          | 10 (91%)               | 22 (61%)         |
| MRI - Medial PSG              |                  |             |             |             |                |                   |                        |                  |
|                               | 59 (73.25%)      | 14 (88%)    | 21 (88%)    | 24 (67%)    | 21 (78%)       | 38 (78%)          | 10 (91%)               | 24 (67%)         |
| Gross pathology - Lateral PSG |                  |             |             |             |                |                   |                        |                  |
|                               | 72 (90%)         | 16 (100%)   | 24 (100%)   | 32 (89%)    | 25 (93%)       | 47 (96%)          | 11 (100%)              | 32 (89%)         |
| Gross pathology - Medial PSG  |                  |             |             |             |                |                   |                        |                  |
|                               | 71 (88.75%)      | 15 (94%)    | 24 (100%)   | 32 (89%)    | 25 (93%)       | 46 (94%)          | 10 (91%)               | 32 (89%)         |
| Pathology grade - Lateral PSG |                  |             |             |             |                |                   |                        |                  |
| 0                             | 4 (5%)           | 0 (0%)      | 0 (0%)      | 4 (11%)     | 2 (7%)         | 2 (4%)            | 0 (0%)                 | 4 (11%)          |
| 1                             | 17 (21.25%)      | 6 (38%)     | 6 (25%)     | 5 (14%)     | 9 (33%)        | 8 (16%)           | 5 (45%)                | 5 (14%)          |
| 2                             | 47 (58.75%)      | 9 (56%)     | 14 (58%)    | 24 (67%)    | 13 (48%)       | 34 (69%)          | 4 (36%)                | 24 (67%)         |
| 3                             | 8 (10%)          | 1 (6%)      | 4 (17%)     | 3 (8%)      | 3 (11%)        | 5 (10%)           | 2 (18%)                | 3 (8%)           |
| Pathology grade - Medial PSG  |                  |             |             |             |                |                   |                        |                  |
| 0                             | 5 (6.25%)        | 1 (6%)      | 0 (0%)      | 4 (11%)     | 2 (7%)         | 3 (6%)            | 1 (9%)                 | 4 (11%)          |
| 1                             | 11 (13.75%)      | 2 (13%)     | 3 (13%)     | 6 (17%)     | 5 (19%)        | 6 (12%)           | 1 (9%)                 | 6 (17%)          |
| 2                             | 50 (62.5%)       | 9 (56%)     | 17 (71%)    | 24 (67%)    | 18 (67%)       | 32 (65%)          | 9 (82%)                | 24 (67%)         |
| 3                             | 10 (12.5%)       | 4 (25%)     | 4 (17%)     | 2 (6%)      | 2 (7%)         | 8 (16%)           | 0 (0%)                 | 2 (6%)           |
